# Supplementary figures and images for: Profiling the Biological Characteristics and Transitions through Upper Tract Tumor Origin, Bladder Recurrence, and Muscle-Invasive Bladder Progression in Upper Tract Urothelial Carcinoma
Source: MDPI journal article supplement (doi:10.3390/ijms23095154), 2022-05-05

Supplemental Figure S1

a: n=214

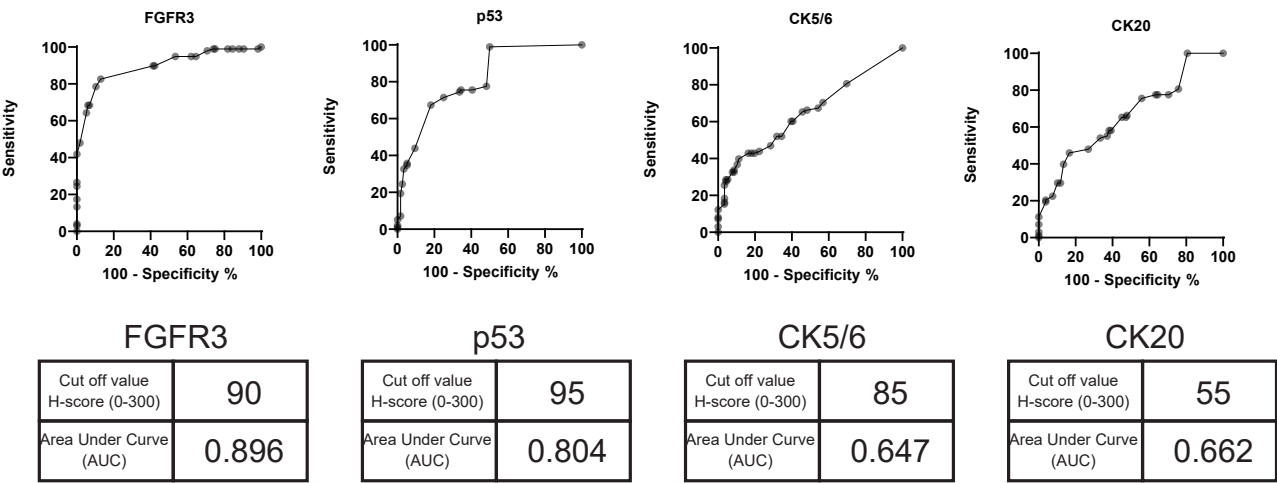

b: n=94

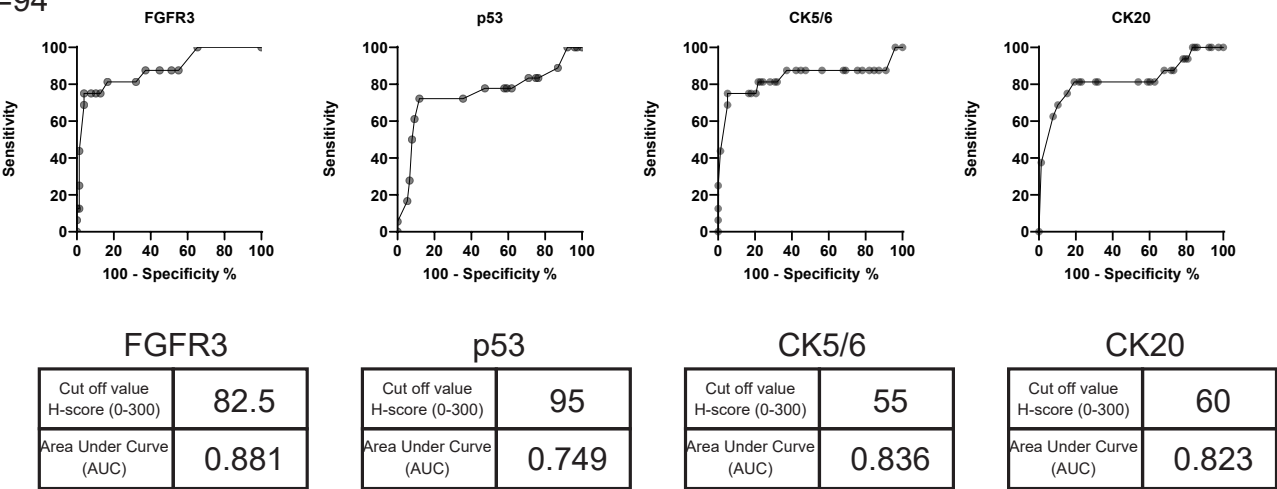

c: n=70

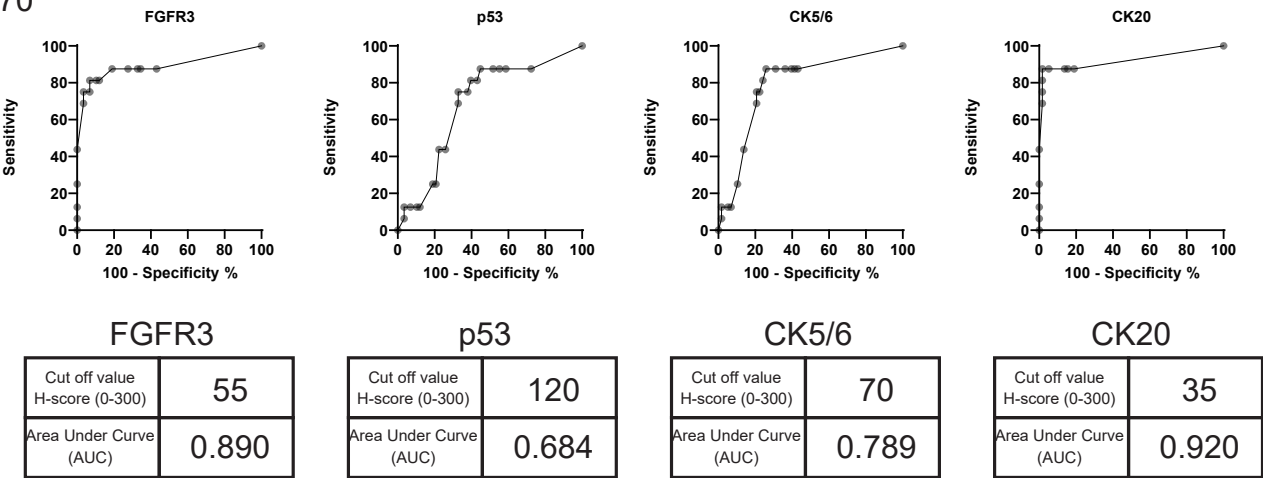

a FGFR3

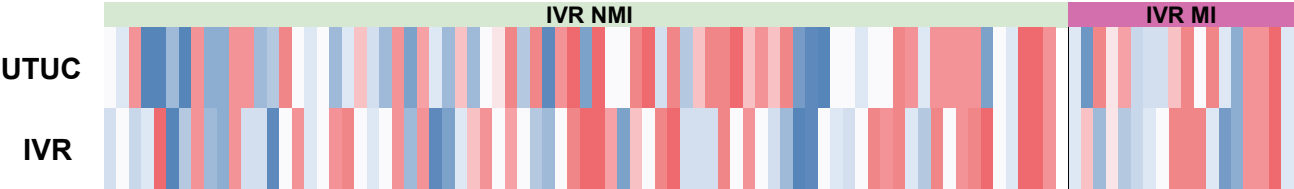

b p53

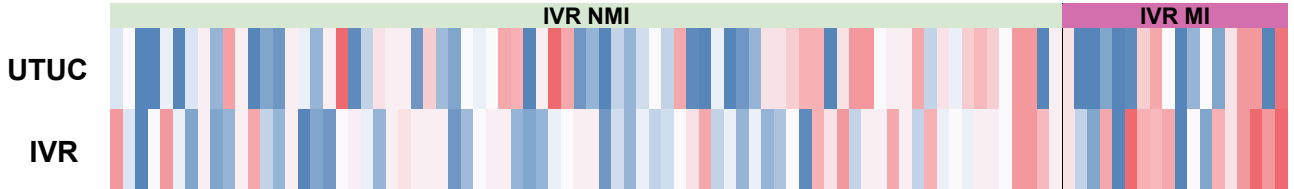

c CK5/6

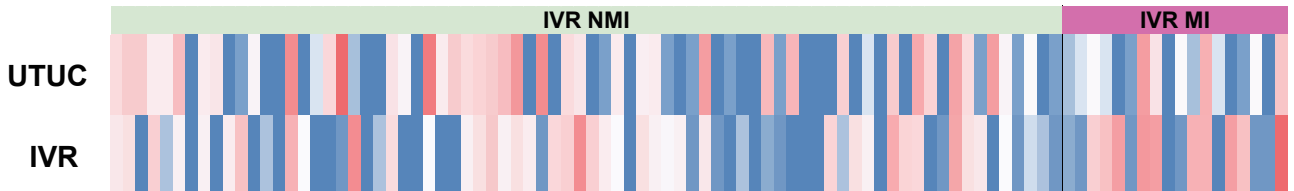

d CK20

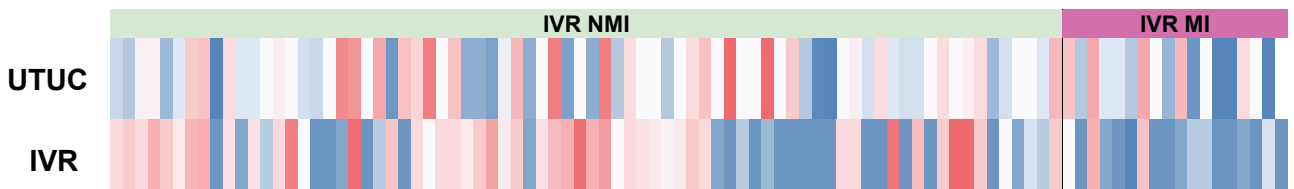

Supplement: s1 [file s1]
